# Supplementary material for: Palm Kernel Shell Activated Carbon as an Inorganic Framework for Shape-Stabilized Phase Change Material
Source: MDPI journal article supplement (doi:10.3390/nano8090689), 2018-09-05
Supplement: s1 [file s1]

## Supporting Information

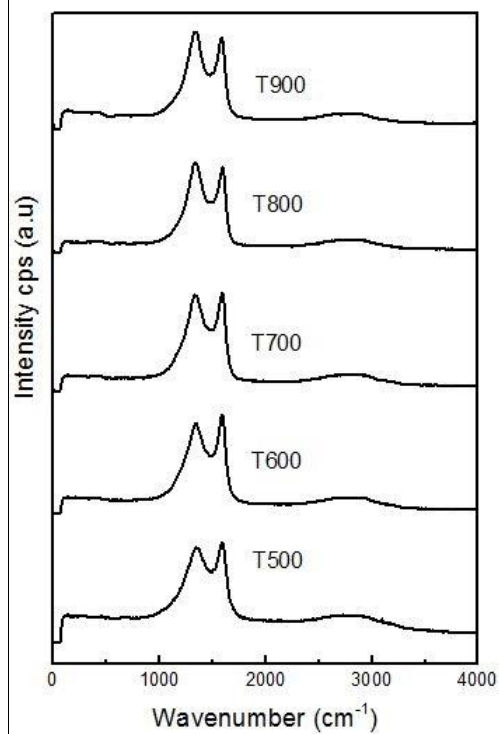

(a)

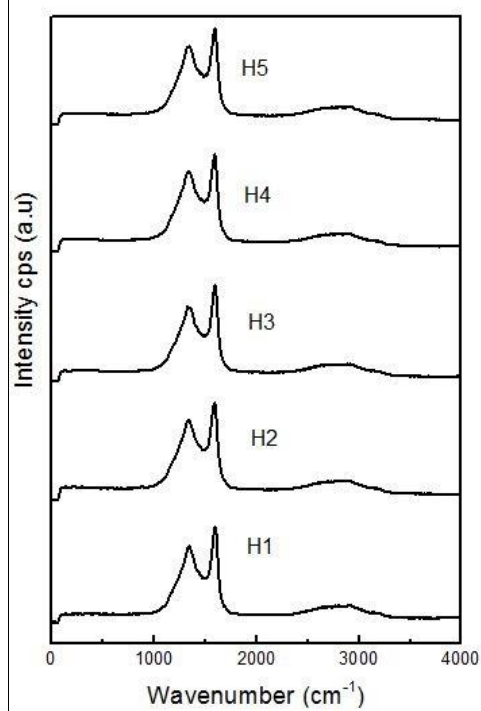

(b)

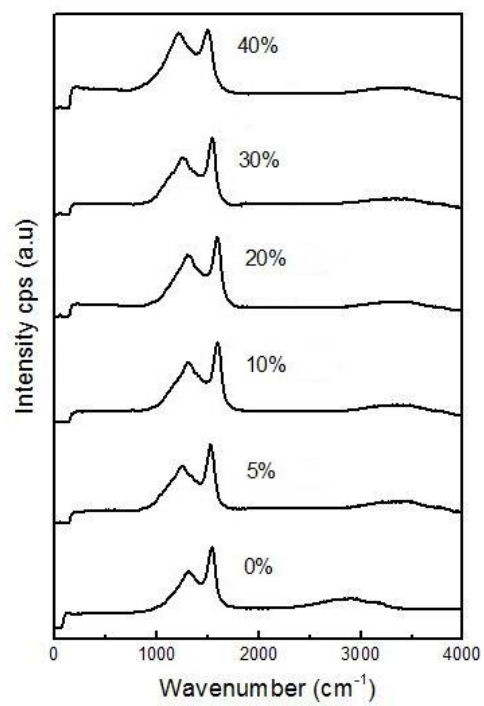

(c)

Fig.1 Raman spectra of PKSAC prepared using three different parameters (a) carbonization temperature, (b) carbonization holding time and (c) concentration of  $\text{H}_3\text{PO}_4$ .

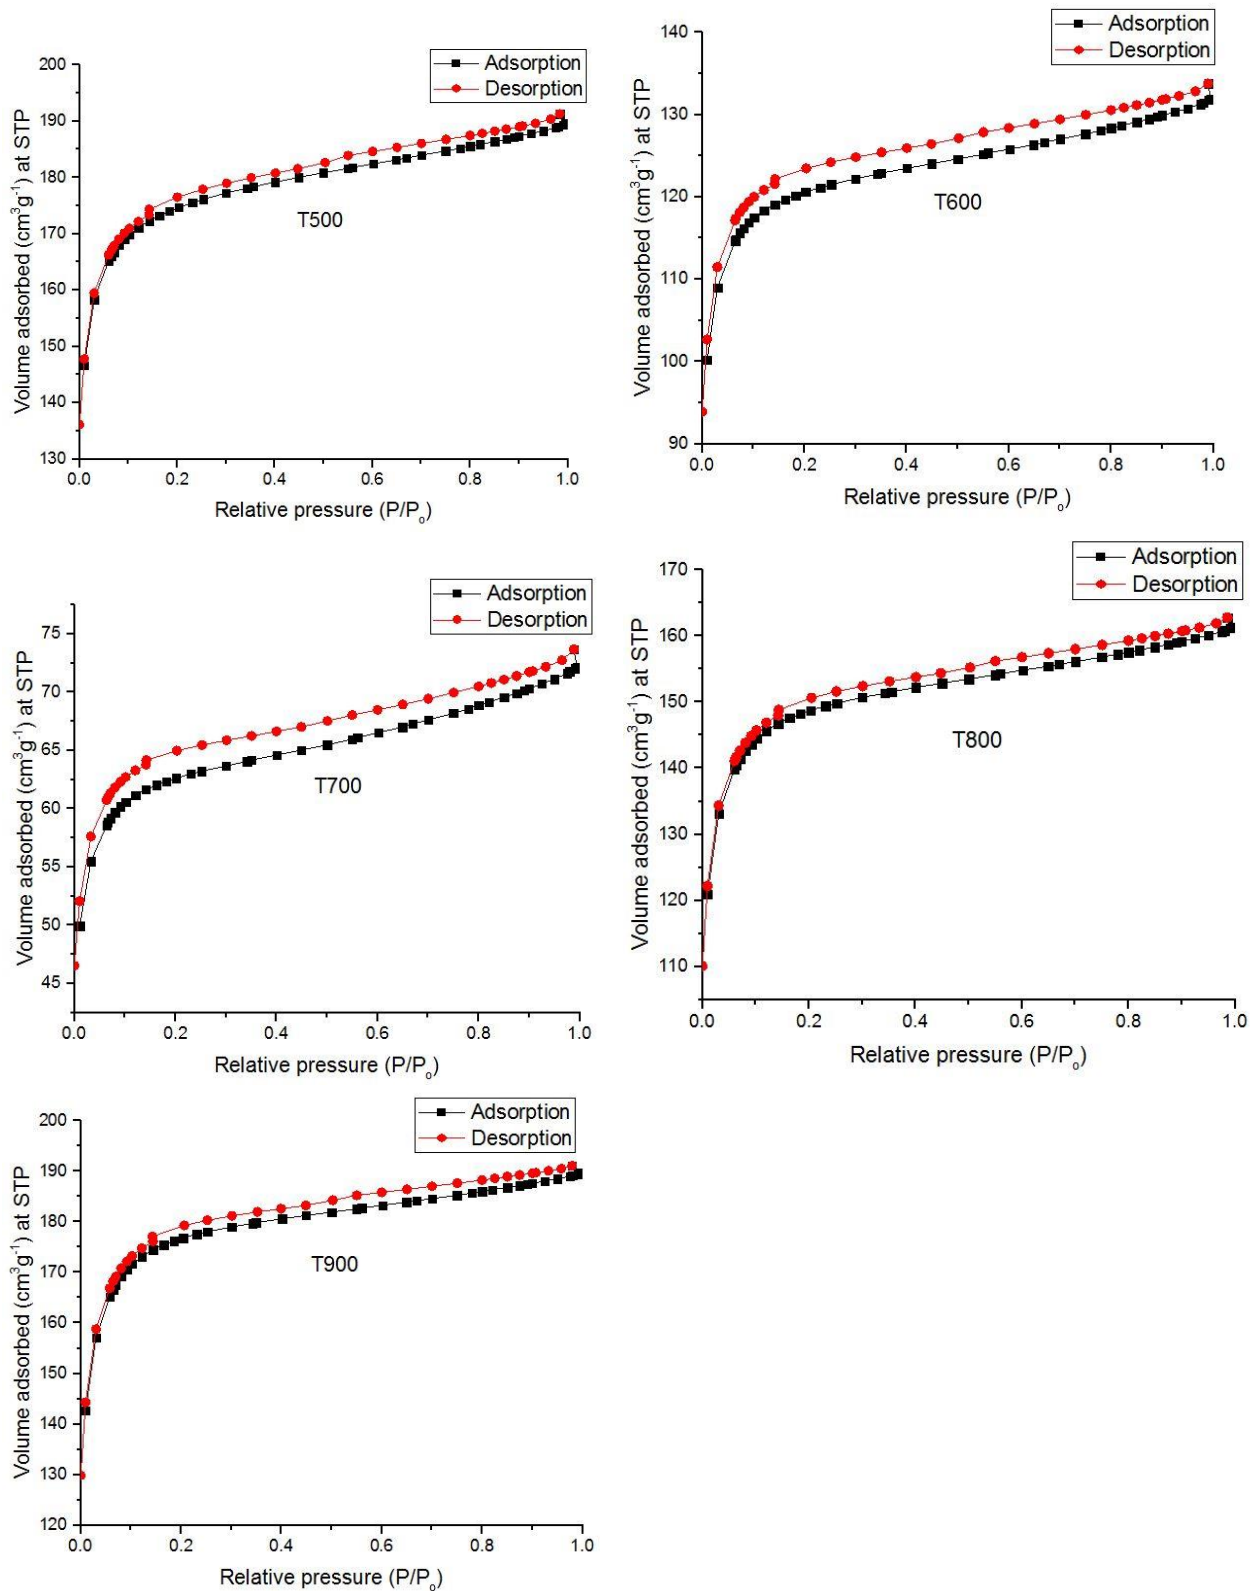

Fig.2a Adsorption-desorption isotherms of activated carbons prepared at various activation temperatures ( $^{\circ}\text{C}$ ) as indicated by the last 3 digits of the sample's name.

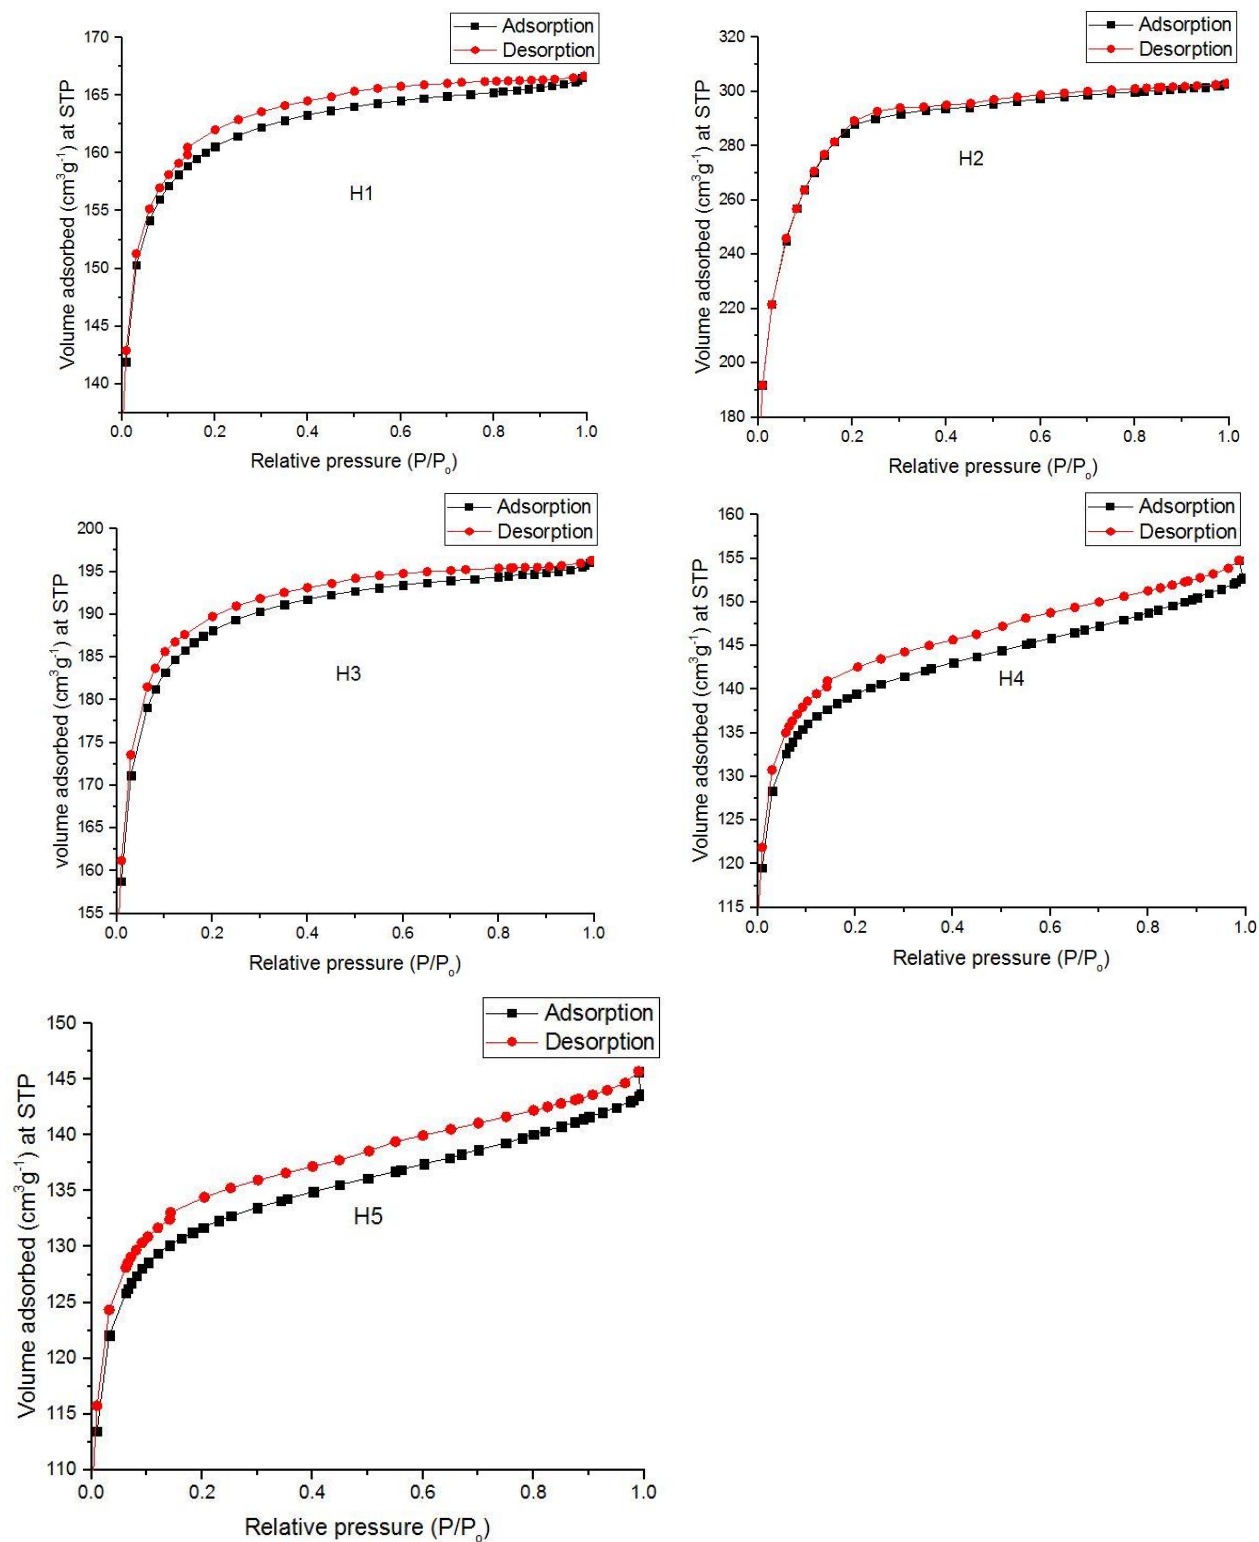

Fig.2b Adsorption-desorption isotherms of activated carbon prepared at various carbonisation holding times (h) as indicated by the last digit of the sample's name.

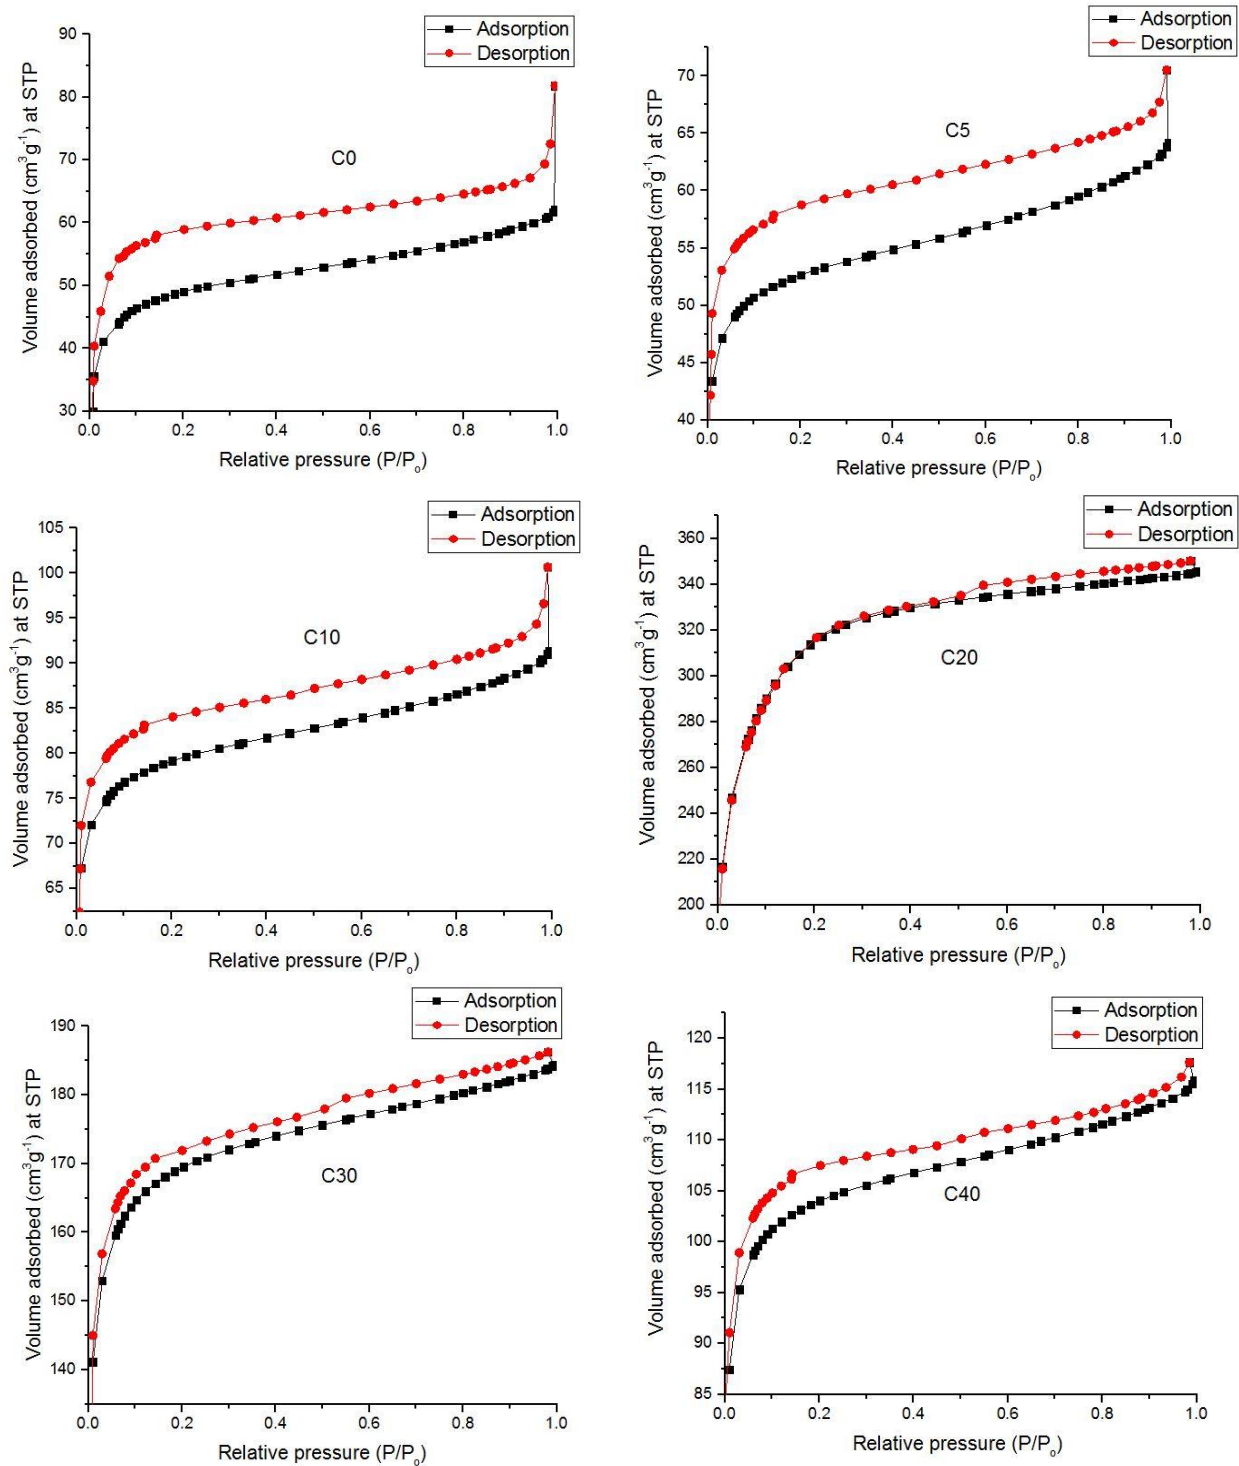

Fig.2c Adsorption-desorption isotherm of activated carbons prepared using various concentrations of  $\text{H}_3\text{PO}_4$  (%) as indicated by the last 2 digits of the sample's name.
